# Supplementary material for: Wip1 inhibitor GSK2830371 inhibits neuroblastoma growth by inducing Chk2/p53-mediated apoptosis
Source: PubMed Central journal article supplement (PMC5171816; doi:10.1038/srep38011), 2016-12-19
Supplement: srep38011-s1.pdf [file srep38011-s1.pdf]

## Supplemental information

### Wip1 inhibitor GSK2830371 inhibits neuroblastoma growth by inducing Chk2/p53-mediated apoptosis

Zhenghu Chen<sup>1,2</sup>, Long Wang<sup>3,4</sup>, Dayong Yao<sup>3,5</sup>, Tianshu Yang<sup>1</sup>, Wen-Ming Cao<sup>3,6</sup>, Jun Dou<sup>3,7</sup>, Jonathan C. Pang<sup>2</sup>, Shan Guan<sup>2</sup>, Huiyuan Zhang<sup>2</sup>, Yang Yu<sup>2</sup>, Yanling Zhao<sup>2</sup>, Yongfeng Wang<sup>2</sup>, Xin Xu<sup>2</sup>, Yan Shi<sup>8</sup>, Roma Patel<sup>8</sup>, Hong Zhang<sup>3</sup>, Sanjeev A. Vasudevan<sup>8</sup>, Shangfeng Liu<sup>1,9\*</sup>, Jianhua Yang<sup>2\*</sup>, and Jed G. Nuchtern<sup>2,8\*</sup>

<sup>1</sup>Department of Ophthalmology, Shanghai Tenth People's Hospital, Tongji University School of Medicine, Shanghai 200072, P. R. China

<sup>2</sup>Texas Children's Cancer Center, Department of Pediatrics, Dan L. Duncan Cancer Center, Baylor College of Medicine, Houston, Texas 77030, USA

<sup>3</sup>Department of Pathology, University of Texas MD Anderson Cancer Center, Houston, Texas 77030, USA

<sup>4</sup>Department of Acupuncture, First Affiliated Hospital, Heilongjiang University of Chinese Medicine, Harbin, Heilongjiang 150040, China

<sup>5</sup>Department of Urology, First Affiliated Hospital, Harbin Medical University, Harbin, Heilongjiang 150001, China

<sup>6</sup>Department of Medical Oncology, Zhejiang Cancer Hospital, Hangzhou, Zhejiang 310022, China

<sup>7</sup>Xinjiang Key Laboratory of Plant Resources and Natural Products Chemistry, Xinjiang Technical Institute of Physics and Chemistry, Chinese Academy of Sciences, Urumqi, Xinjiang 830011, China

<sup>8</sup>Division of Pediatric Surgery, Michael E. DeBakey Department of Pediatric Surgery, Dan L. Duncan Cancer Center, Baylor College of Medicine, Houston, Texas 77030, USA

<sup>9</sup>Department of Stomatology, Huashan Hospital, Fudan University, Shanghai 200040, China

#### Running head: Wip1 inhibition in neuroblastoma

\*Correspondence to:

Jed G. Nuchtern, Phone: 1-832-822-3135, Fax: 1-832-825-2141. Email: [nuchtern@bcm.edu](mailto:nuchtern@bcm.edu);

Jianhua Yang, Phone: 1-832-824-4572, Fax: 1-832-825-1206. Email: [jianhuay@bcm.edu](mailto:jianhuay@bcm.edu);

Shangfeng Liu, Tel/fax: +86-21-6562662. Email: [shangfenglifudan@163.com](mailto:shangfenglifudan@163.com).

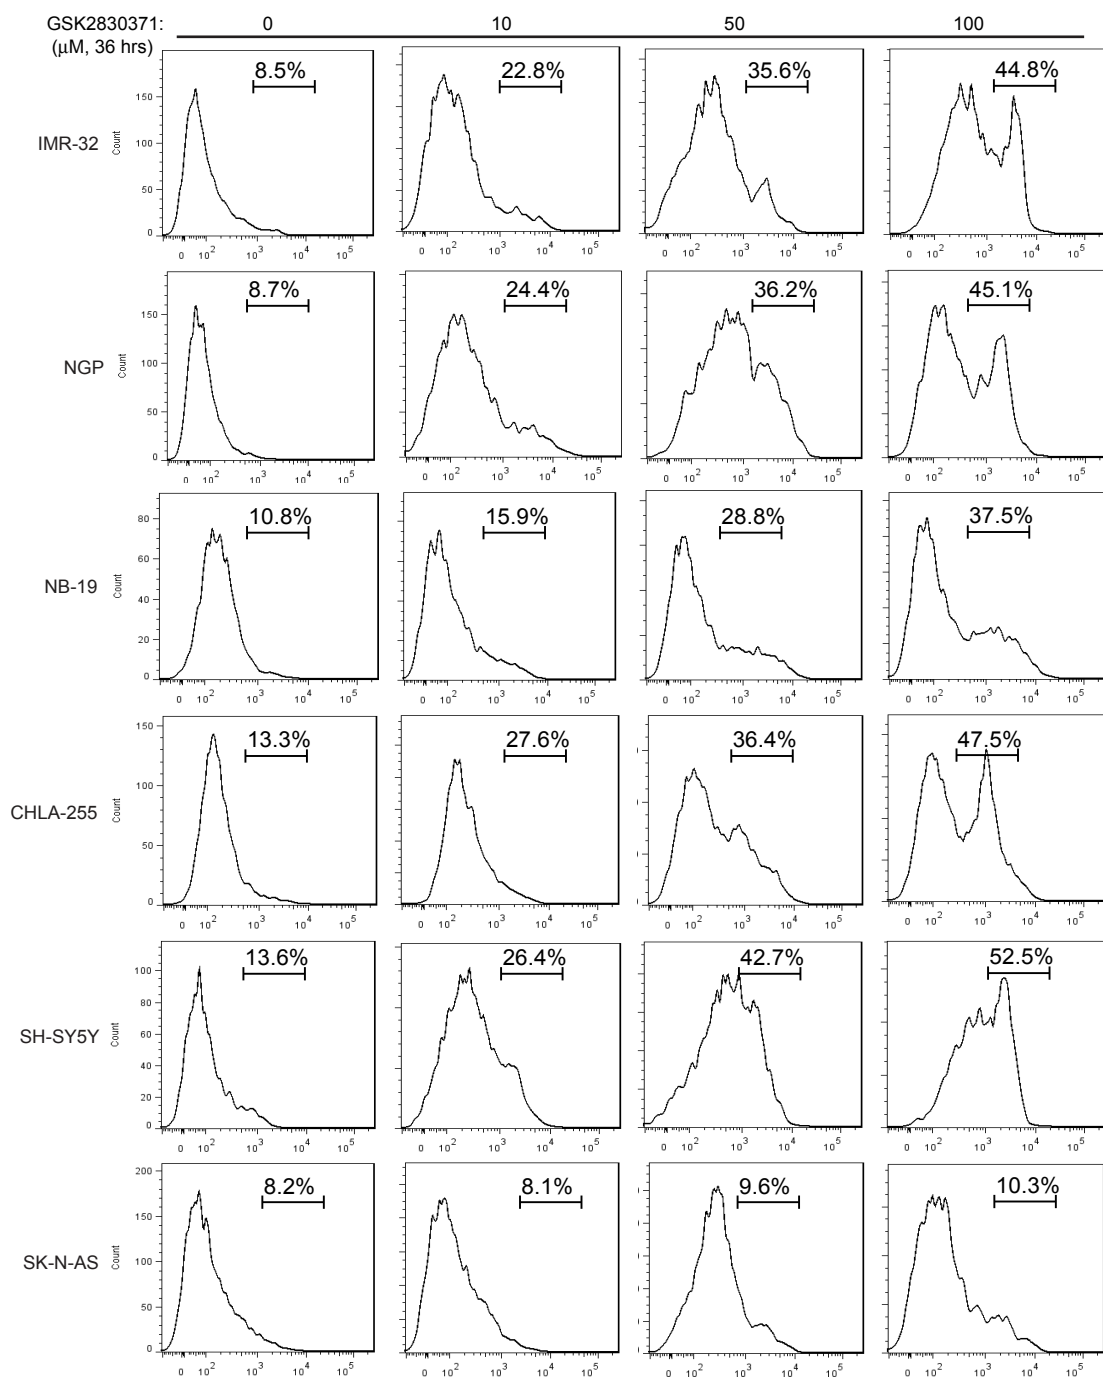

**Supplemental Figure S1. GSK2830371 induces cell death in *p53* wild-type, but not in *p53* mutant NB cells.** PI staining of IMR-32, NGP, NB-19, CHLA-255, SH-SY5Y, and SK-N-AS cells after treated with the indicated concentrations of GSK2830371 for 36 hrs. The cells were then analyzed by flow cytometry for the percentage of dead cells.

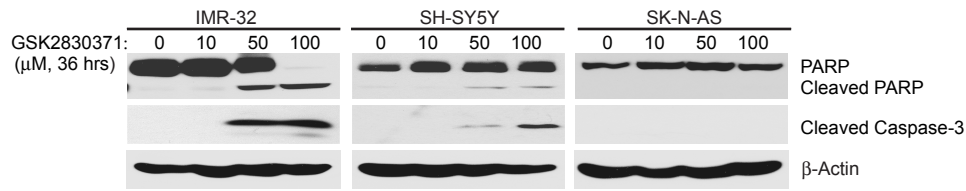

**Supplemental Figure S2. GSK2830371 induces apoptosis in *p53* wild-type, but not in *p53* mutant NB cells.** IMR-32, SH-SY5Y and SK-N-AS cells were treated with the indicated concentrations of GSK2830371 for 36 hrs. The cells were then lysed and subjected to SDS-PAGE followed by immunoblotting with anti-PARP and Caspase-3 antibodies.  $\beta$ -Actin was used as a loading control.

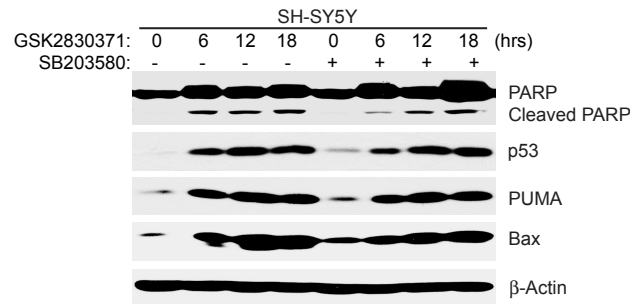

**Supplemental Figure S3. p38 inhibitor SB203580 suppresses GSK2830371-induced cell death and p53 activation.** SH-SY5Y cells were treated with or without p38 inhibitor SB203580 (10  $\mu$ M) for 2 hrs before exposed to GSK2830371 (50  $\mu$ M) for indicated time points (0-18 hrs). Cells were collected and lysed at the end of treatment followed by SDS-PAGE, and immunoblotting with the indicated antibodies.  $\beta$ -Actin was used as a loading control.

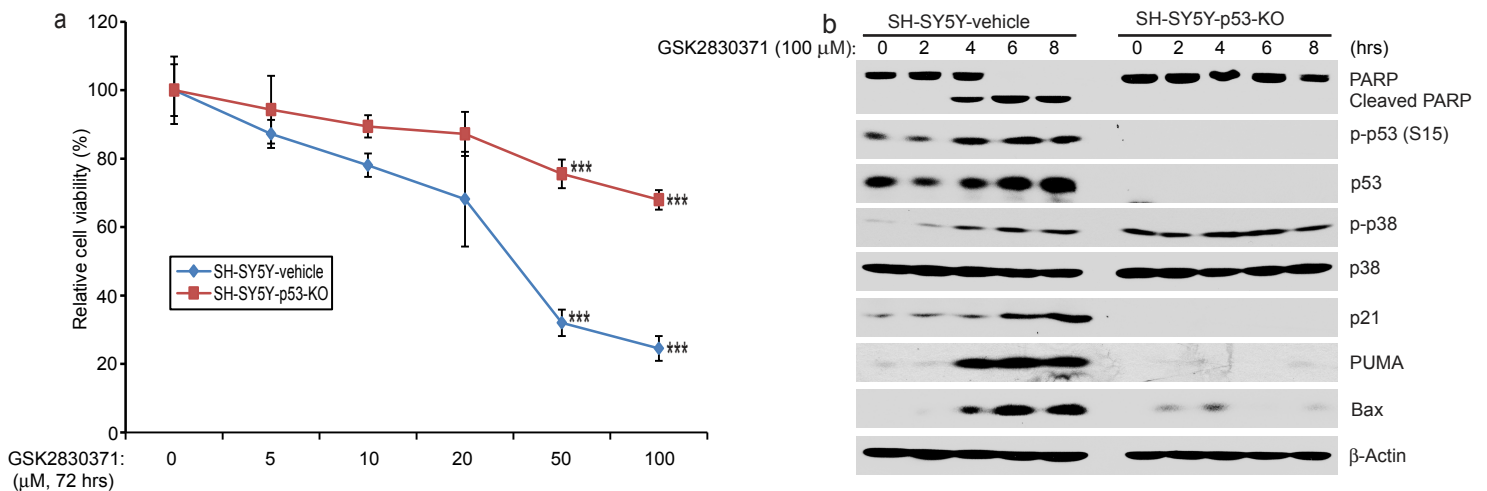

**Supplemental Figure S4. p53 activation plays a major role in GSK2830371-induced cytotoxicity in SH-SY5Y cells.** (a) SH-SY5Y-vehicle control cells and SH-SY5Y-*p53*-KO cells were seeded in 96-well plates, respectively. After incubating with the increasing concentrations of GSK2830371 for 72 hrs, cell viability was then measured by the CCK-8 assay and the results were represented as % vehicle  $\pm$  S.D.  $P < 0.001$  (\*\*\*) (Student's t-test, two-tailed) was indicated. (b) SH-SY5Y-control cells and SH-SY5Y-*p53*-KO cells were treated with GSK2830371 (100  $\mu$ M) for the indicated time points (0-8 hrs). And then the cells were harvested and lysed, followed by SDS-PAGE and immunoblotting with the indicated antibodies.  $\beta$ -Actin was used as a loading control.

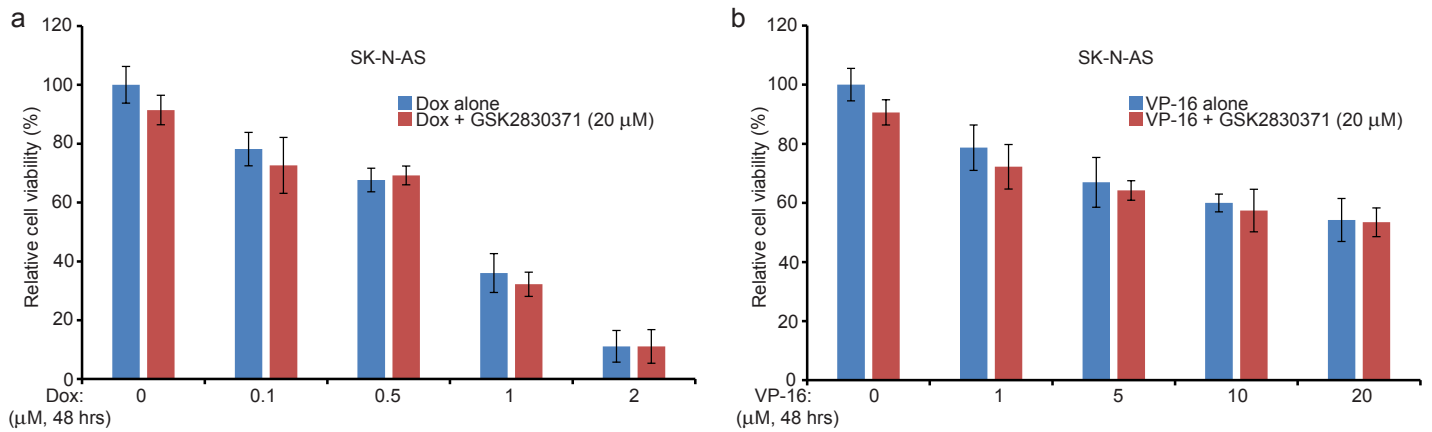

**Supplemental Figure S5. GSK2830371 fails to enhance Dox- and VP-16-induced cytotoxicity in *p53* mutant SK-N-AS cells.** SK-N-AS cells were seeded in 96-well plates and were incubated with the indicated concentrations of Dox (**a**) or VP-16 (**b**) plus DMSO or 20 μM of GSK2830371 for 48 hrs. Cell viability was then measured by the CCK-8 assay. Results were represented as % vehicle ± S.D.

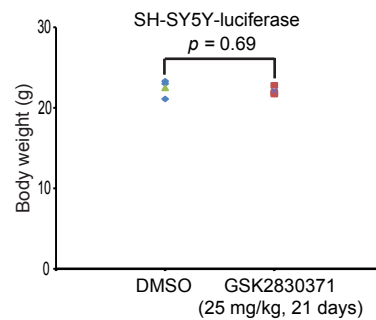

**Supplemental Figure S6. GSK2830371 does not have significant effect on mouse body weights.** Mouse body weights at the end of treatment ( $P=0.69$ ) (Student's t-test, two-tailed).
